# Supplementary material
Source: PubMed Central journal article supplement (PMC6042140)
Supplement: pnas.1801846115.sapp.pdf [file pnas.1801846115.sapp.pdf]

# Supplementary Materials for

## Species coexistence through simultaneous fluctuation-dependent mechanisms

Andrew D. Letten,<sup>a,b\*</sup> Manpreet Dhami,<sup>a,c</sup> Po-Ju Ke,<sup>a</sup> & Tadashi Fukami<sup>a</sup>

<sup>a</sup>Department of Biology, Stanford University, Stanford, California, 94305-5020, USA

<sup>b</sup>University of Canterbury, Christchurch, New Zealand

<sup>c</sup>Biodiversity and Conservation, Landcare Research, Lincoln, New Zealand

\*To whom correspondence should be addressed; E-mail: [andrewletten@gmail.com](mailto:andrewletten@gmail.com)

### **This PDF file includes:**

Figs. S1 to S12

Tables S1 to S3

Supplementary text

# Supplementary figures

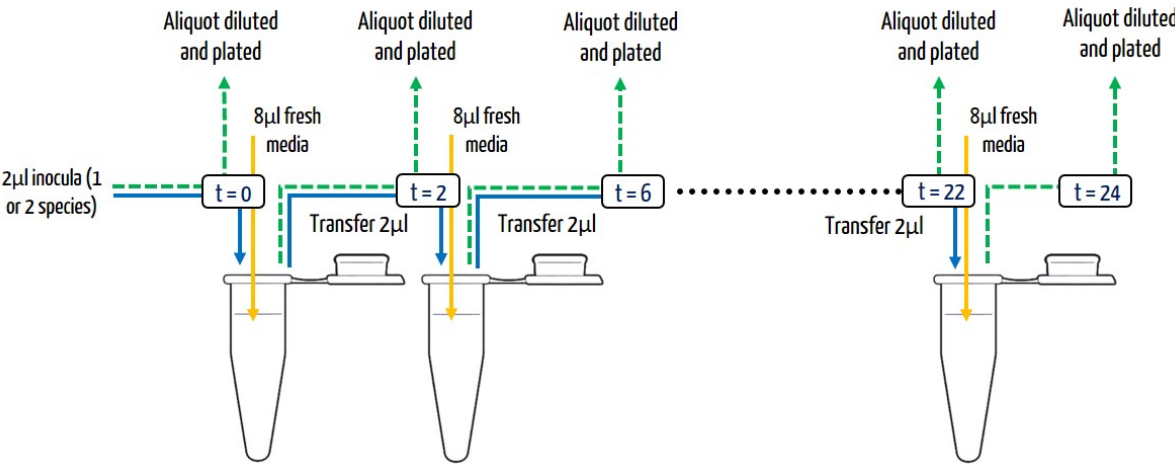

Figure S1: Illustration of the design of mixed- and mono-culture simulations and experiments.

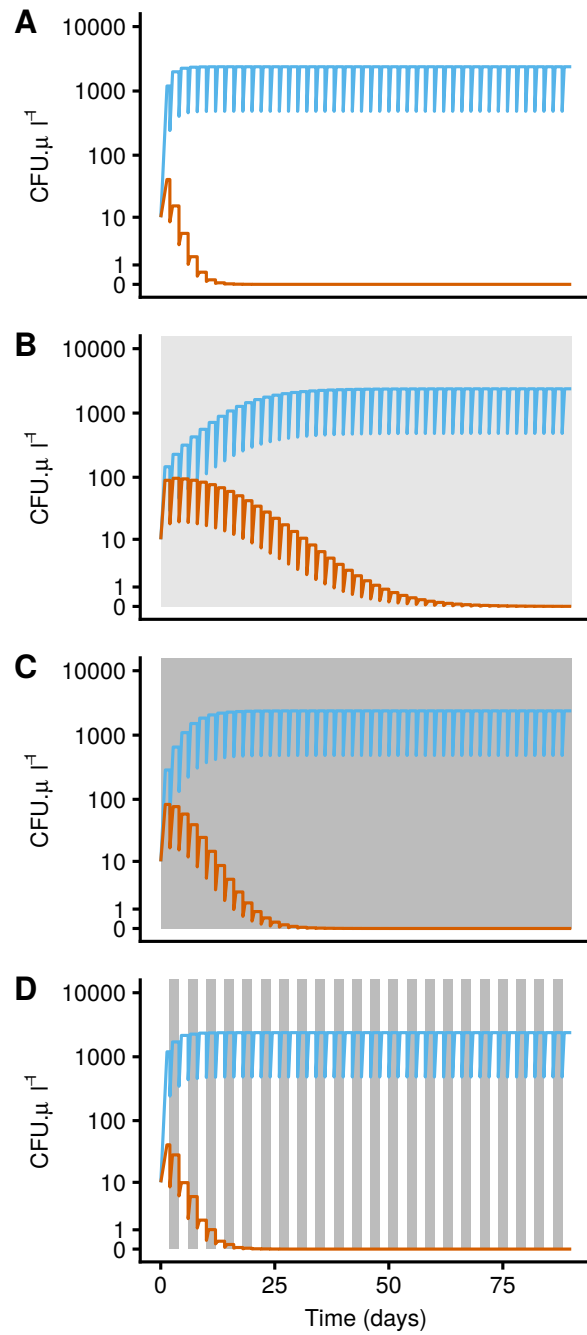

Figure S2: Simulated resource competition between *M. reukaufii* (blue) and *M. gruessii* (dark orange) at constant 10% (A), 30% (B), 50% (C) and fluctuating 10-50% (D) sucrose.

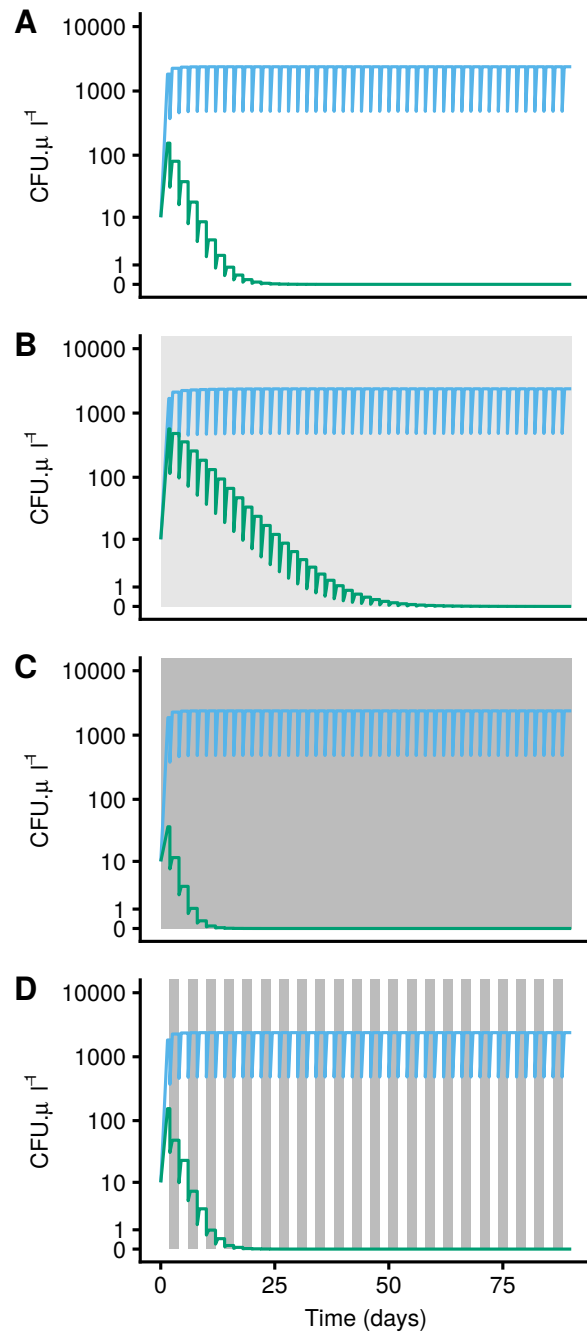

Figure S3: Simulated resource competition between *M. reukaufii* (blue) and *S. bombicola* (green) at constant 10% (A), 30% (B), 50% (C) and fluctuating 10-50% (D) sucrose.

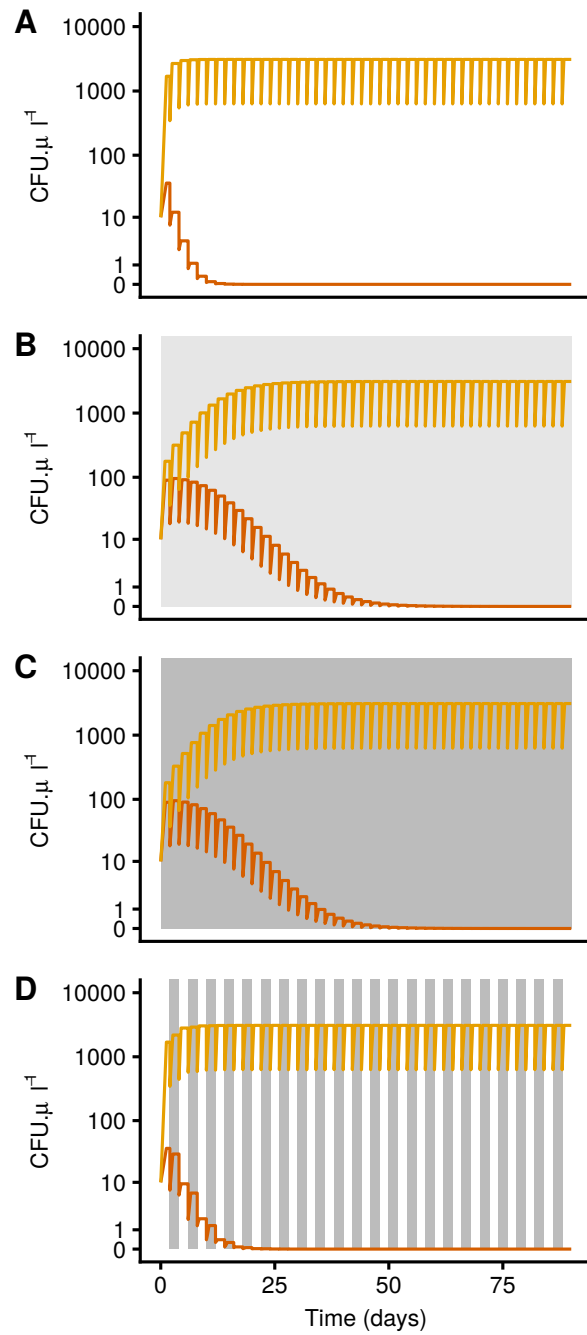

Figure S4: Simulated resource competition between *M. gruessii* (dark orange) and *M. koreensis* (light orange) at constant 10% (A), 30% (B), 50% (C) and fluctuating 10-50% (D) sucrose.

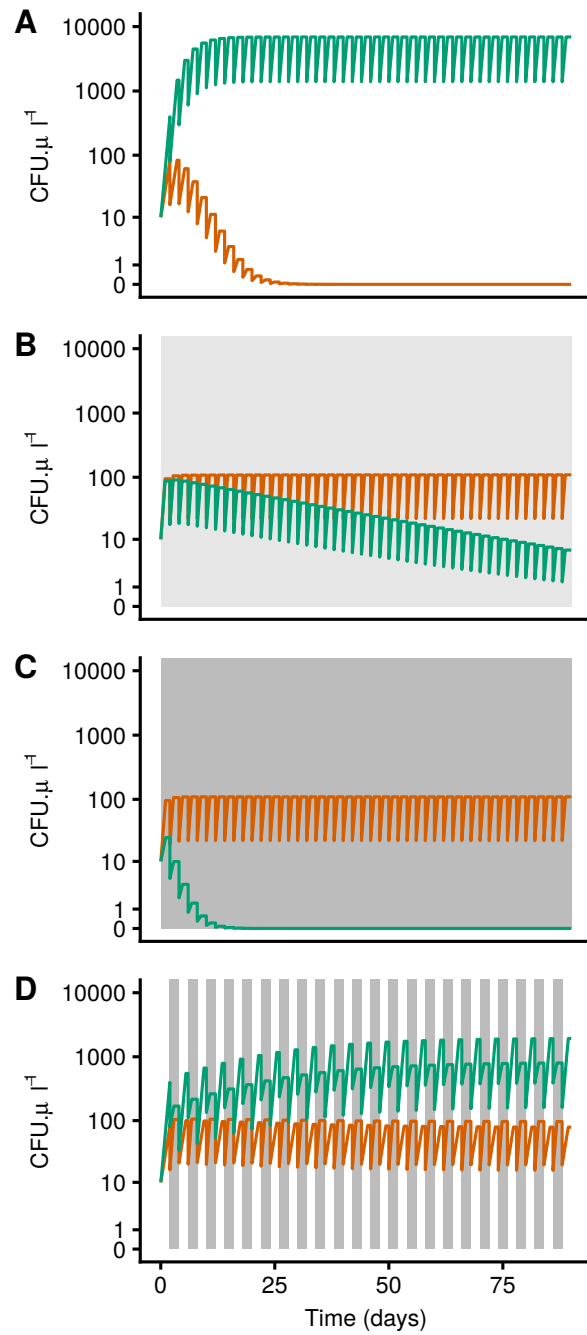

Figure S5: Simulated resource competition between *M. gruessii* (dark orange) and *S. bombicola* (green) at constant 10% (A), 30% (B), 50% (C) and fluctuating 10-50% (D) sucrose.

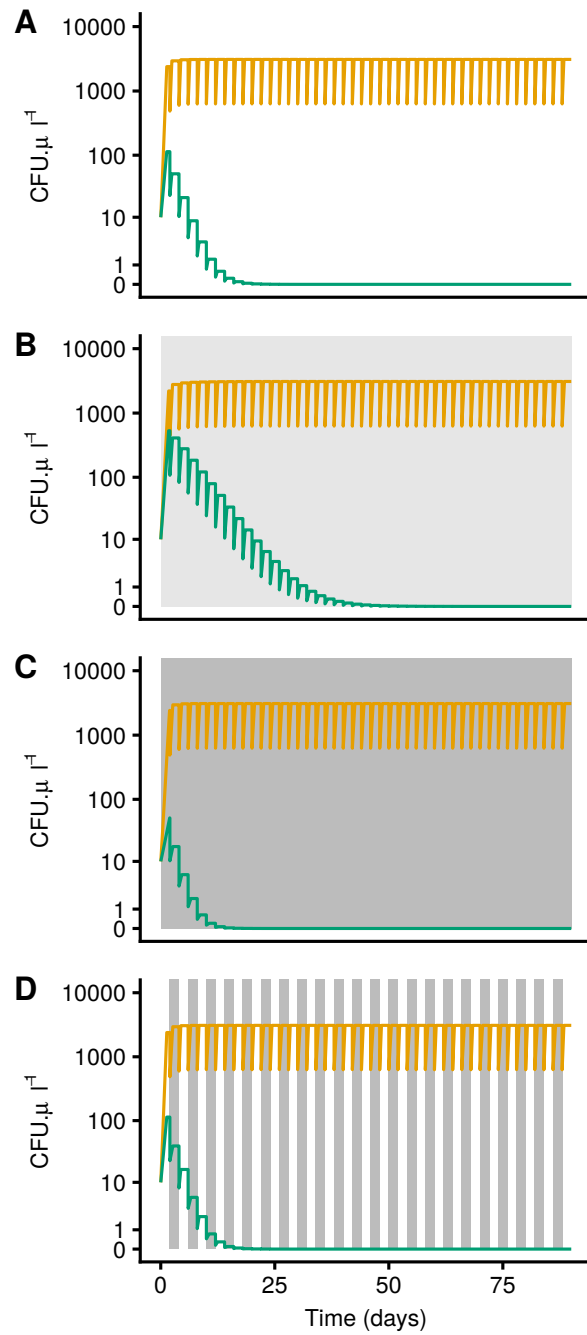

Figure S6: Simulated resource competition between *M. koreensis* (light orange) and *S. bombicola* (green) at constant 10% (A), 30% (B), 50% (C) and fluctuating 10-50% (D) sucrose.

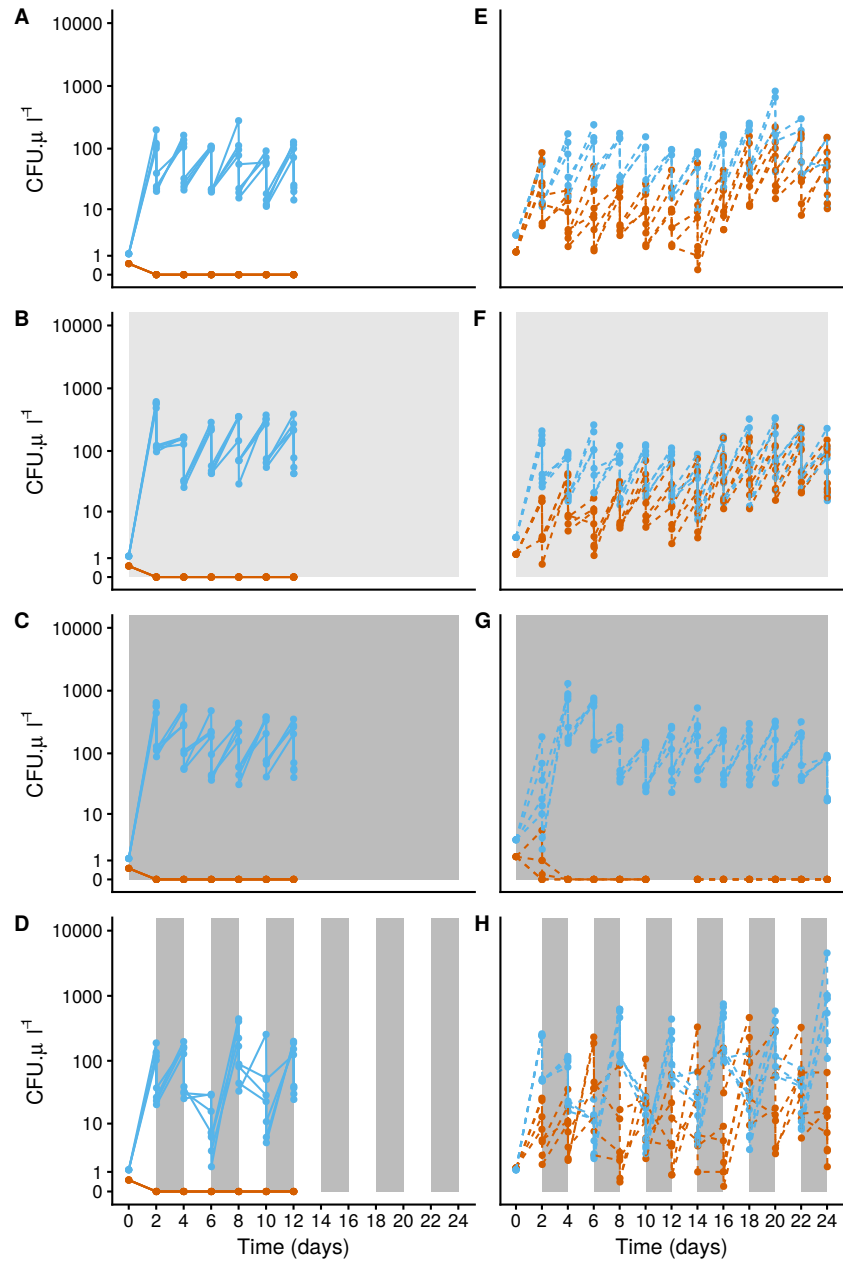

Figure S7: Mixed (solid lines) and monoculture (dashed lines) times-series for *M. guessii* (dark orange) and *M. reukaufii* (blue) at constant 10% (A,E), 30% (B,F), 50% (C,G) and fluctuating 10-50% (D,H) sucrose. Due to rapid exclusion of *M. guessii*, mixed culture assays were terminated after 12 days.



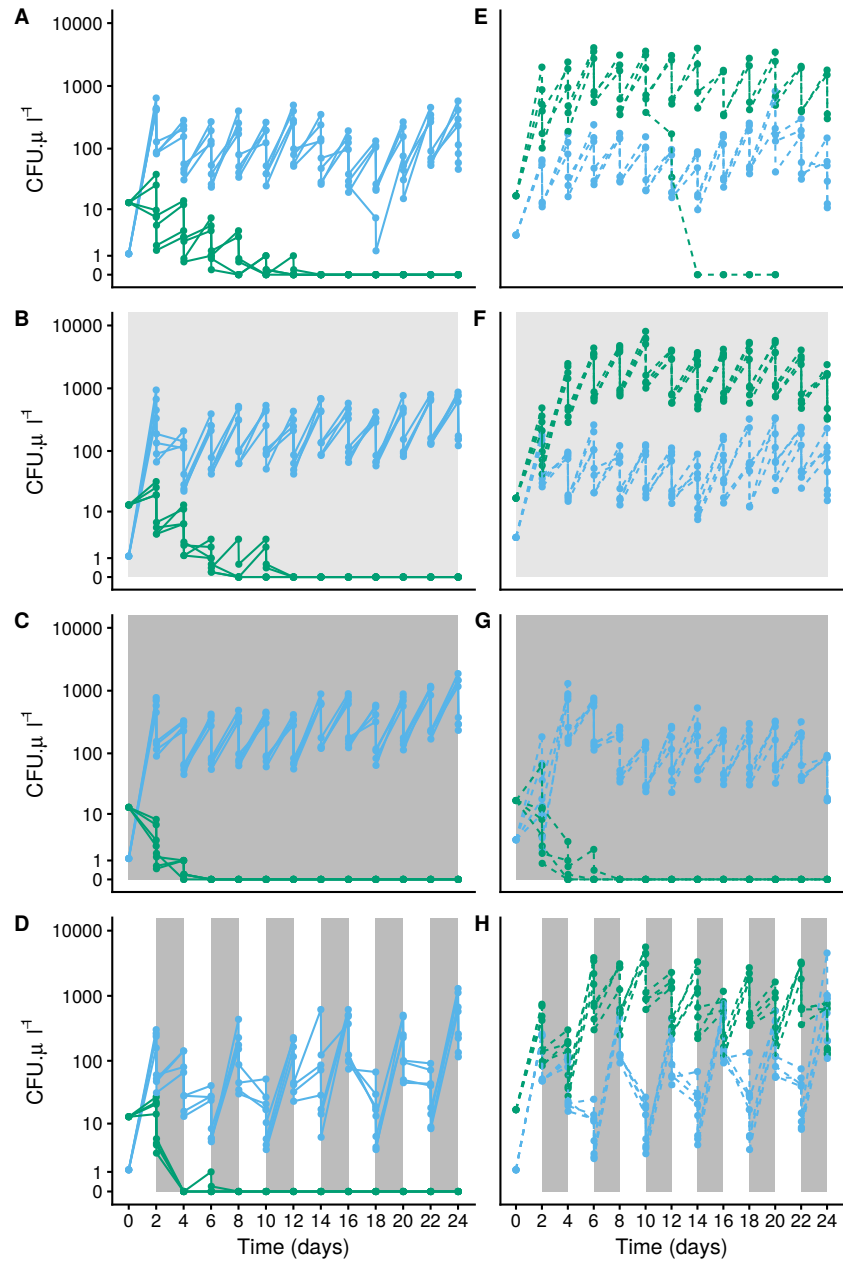

Figure S8: Mixed (solid lines) and monoculture (dashed lines) times-series for *S. bombicola* (green) and *M. reukaufii* (blue) at constant 10% (A,E), 30% (B,F), 50% (C,G) and fluctuating 10-50% (D,H) sucrose.

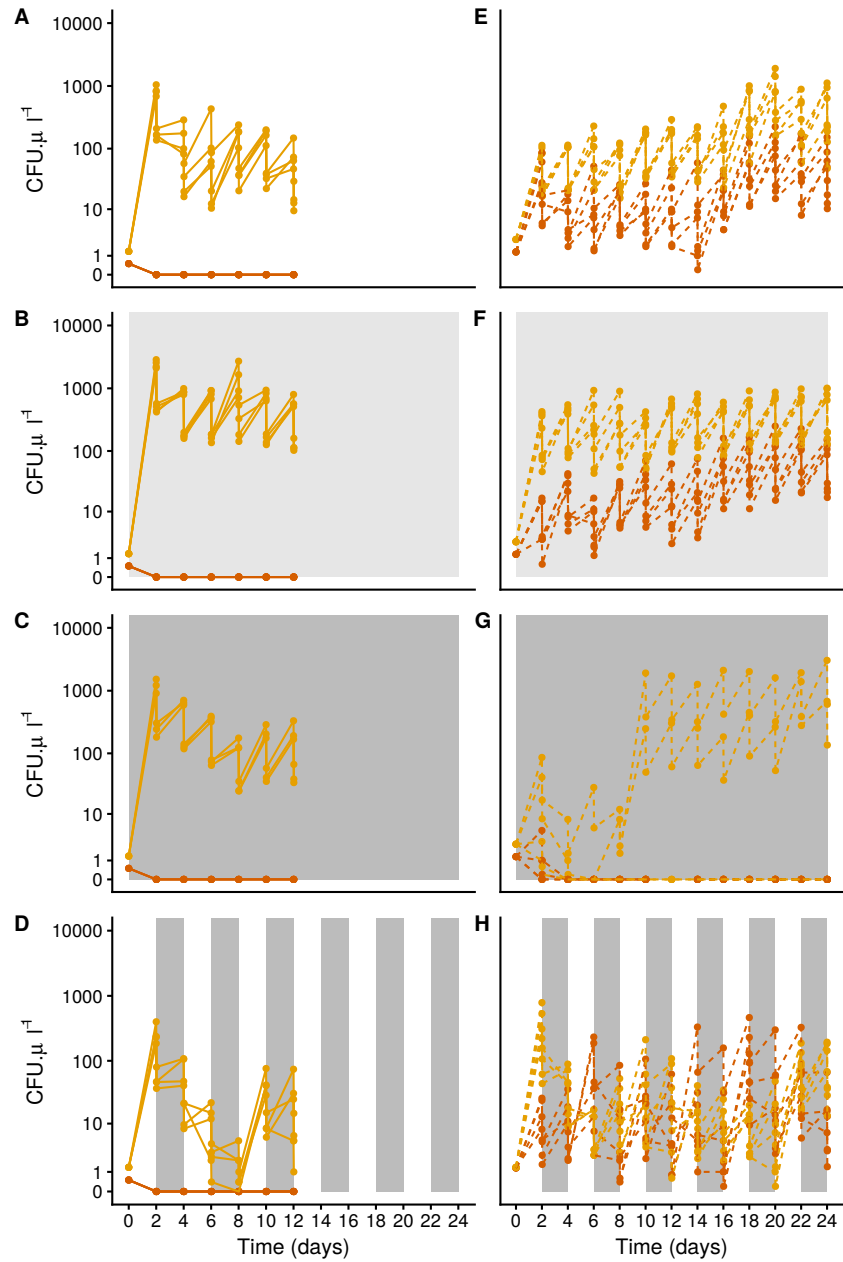

Figure S9: Mixed (solid lines) and monoculture (dashed lines) times-series for *M. gruessii* (dark orange) and *M. koreensis* (light orange) at constant 10% (A,E), 30% (B,F), 50% (C,G) and fluctuating 10-50% (D,H) sucrose. Due to rapid exclusion of *M. gruessii*, mixed culture assays were terminated after 12 days.

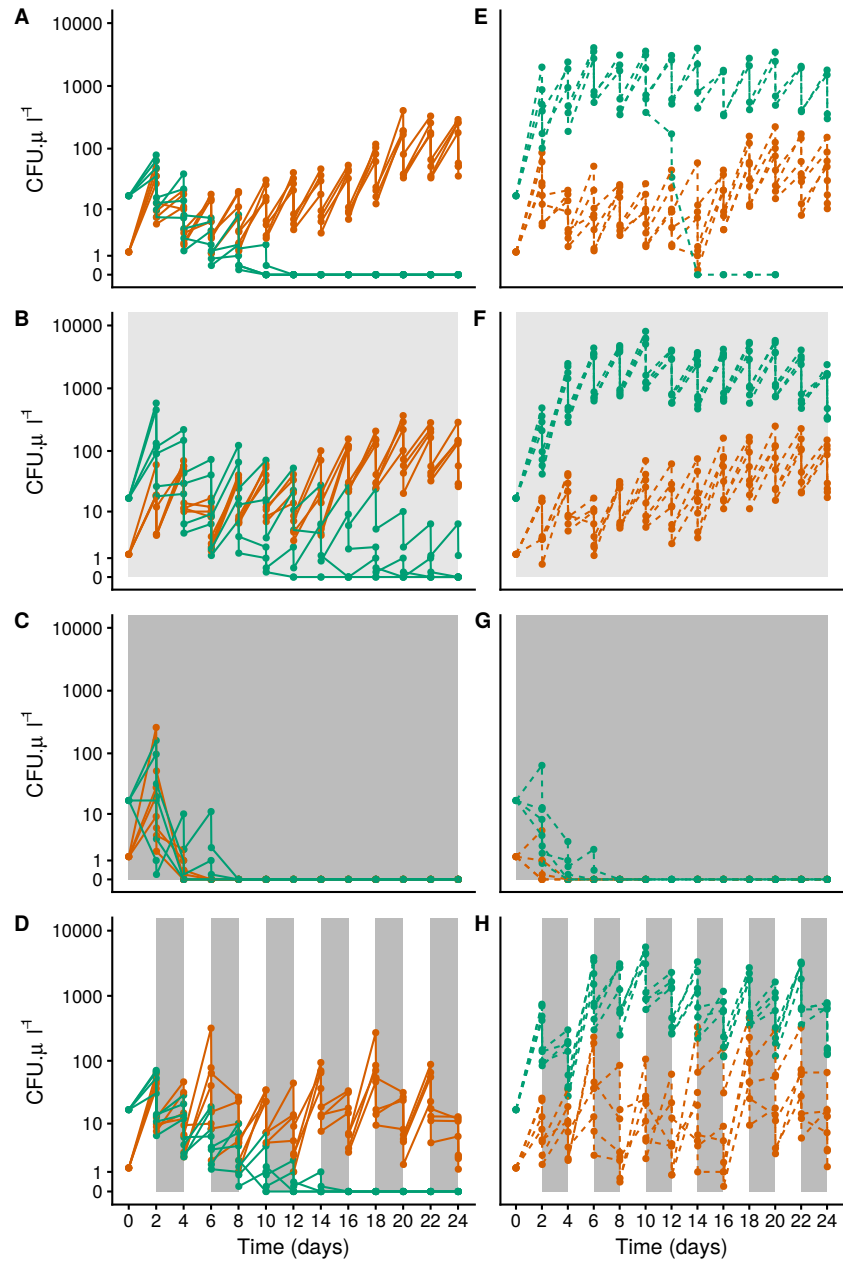

Figure S10: Mixed (solid lines) and monoculture (dashed lines) times-series for *S. bombicola* (green) and *M. gruessii* (dark orange) at constant 10% (A,E), 30% (B,F), 50% (C,G) and fluctuating 10-50% (D,H) sucrose.

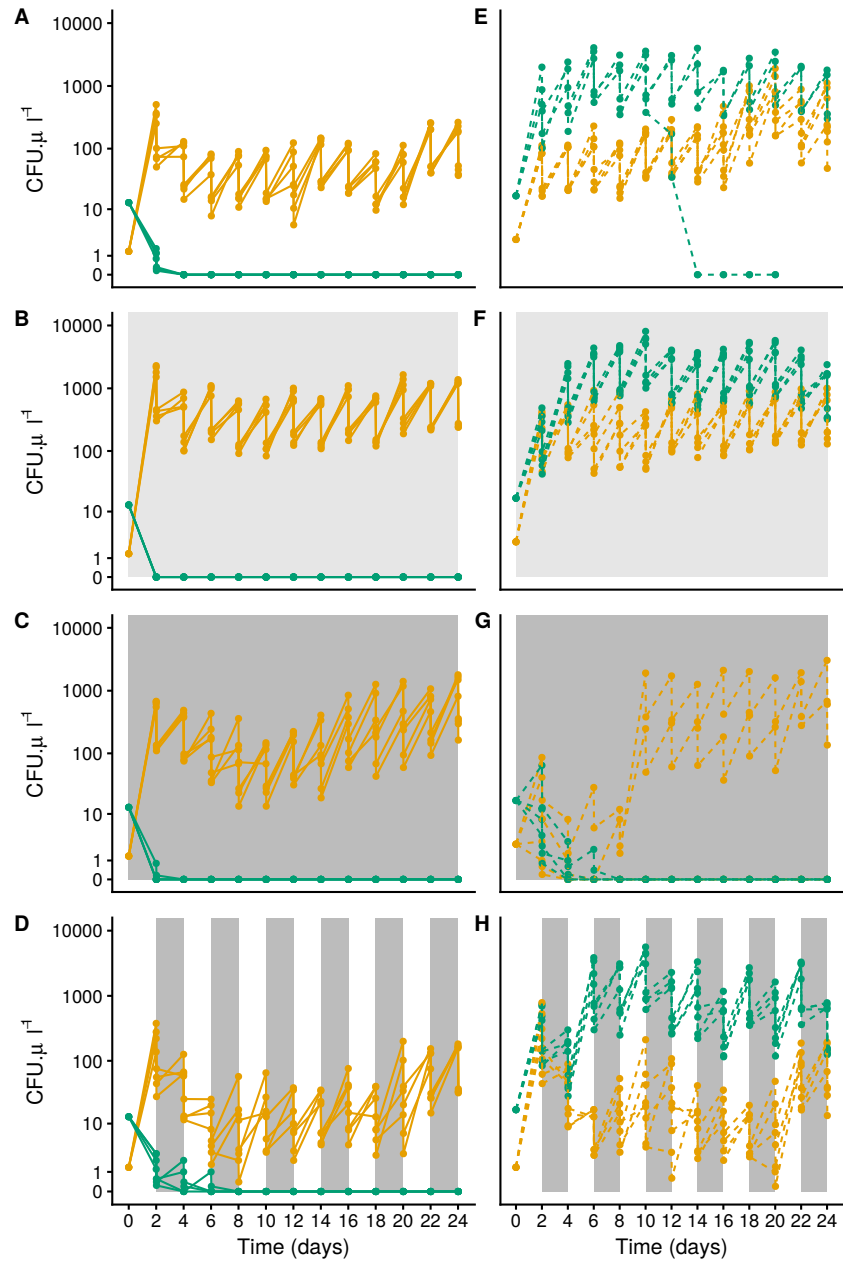

Figure S11: Mixed (solid lines) and monoculture (dashed lines) times-series for *S. bombicola* (green) and *M. koreensis* (light orange) at constant 10% (A,E), 30% (B,F), 50% (C,G) and fluctuating 10-50% (D,H) sucrose.

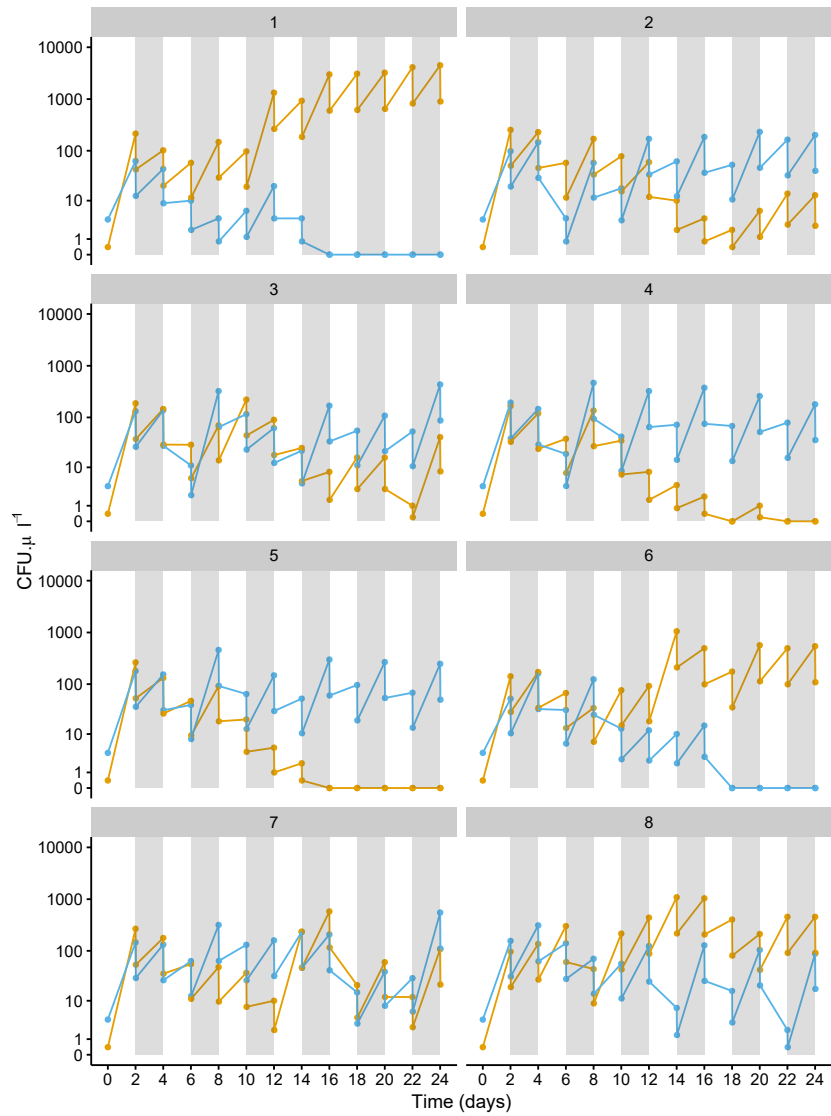

Figure S12: Replicated experiment. Mixed culture times-series for *M. koreensis* (light orange) and *M. reukaufii* (blue) under fluctuating 10-50% (D) sucrose.

## Supplementary tables

Table S1: Model parameters and  $R^*$  for each species at each sucrose concentration ( $R^* = \frac{DK}{\mu_{max} - D}$ , where  $D = 0.03352 \text{ hr}^{-1}$ ).

| Species             | Sucrose (%) | $K$ (mM) | $\mu_{max}$ ( $\text{hr}^{-1}$ ) | $Q$ (mM) | $R^*$  |
|---------------------|-------------|----------|----------------------------------|----------|--------|
| <i>M. koreensis</i> | 10          | 0.0058   | 0.1741                           | 0.0009   | 0.0014 |
|                     | 30          | 0.0029   | 0.1305                           | 0.0009   | 0.0010 |
|                     | 50          | 0.0365   | 0.1219                           | 0.0009   | 0.0140 |
| <i>M. reukaufii</i> | 10          | 0.0047   | 0.1469                           | 0.0011   | 0.0014 |
|                     | 30          | 0.0067   | 0.1225                           | 0.0011   | 0.0025 |
|                     | 50          | 0.0084   | 0.1409                           | 0.0011   | 0.0026 |
| <i>S. bombicola</i> | 10          | 0.0048   | 0.0772                           | 0.0004   | 0.0037 |
|                     | 30          | 0.0083   | 0.0966                           | 0.0004   | 0.0044 |
|                     | 50          | 0.0021   | 0.0349                           | 0.0004   | 0.0526 |
| <i>M. gruessii</i>  | 10          | 0.0169   | 0.0442                           | 0.0245   | 0.0530 |
|                     | 30          | 0.0003   | 0.0992                           | 0.0245   | 0.0002 |
|                     | 50          | 0.0426   | 0.0930                           | 0.0245   | 0.0240 |

Table S2: Contribution of  $\Delta I$  and  $\Delta N$  to invader growth rate for all species pairs in all treatments, alongside simulation predictions and experimental outcomes. Experimental results inconsistent with model predictions are bolded.  $\Delta I$  boxes greyed-out under constant treatments to indicate there is no storage effect in the absence of environmental fluctuations.

| Treatment   | Species pair | $r_{inv}$           | $\Delta I$            | $\Delta N$         | Predicted outcome | Observed outcome   |
|-------------|--------------|---------------------|-----------------------|--------------------|-------------------|--------------------|
| Fluctuating | Mr<br>Mk     | 0.00073<br>0.000065 | 0.00092<br>0          | -0.00092<br>0.0013 | coexist           | coexist*           |
|             | Mr<br>Mg     | 0.05<br>-0.017      | 0.0054<br>0.0011      | -0.032<br>0.06     | Mg excluded       | Mg excluded        |
|             | Mr<br>Sb     | 0.065<br>-0.021     | 0.0048<br>-0.00091    | -0.027<br>0.065    | Sb excluded       | Sb excluded        |
|             | Mk<br>Mg     | 0.055<br>-0.017     | 0.01<br>0.0021        | -0.033<br>0.059    | Mg excluded       | Mg excluded        |
|             | Mk<br>Sb     | 0.06<br>-0.021      | -0.00074<br>0.0000074 | -0.029<br>0.064    | Sb excluded       | Sb excluded        |
|             | Mg<br>Sb     | 0.018<br>0.0029     | 0.011<br>0.0088       | -0.0037<br>0.0043  | coexist           | <b>Sb excluded</b> |
|             | Mr<br>Mk     | -0.005<br>0.006     |                       | 0.021<br>-0.02     | Mr excluded       | Mr excluded        |
|             | Mr<br>Mg     | 0.08<br>-0.02       |                       | -0.023<br>0.08     | Mg excluded       | Mg excluded        |
|             | Mr<br>Sb     | 0.03<br>-0.016      |                       | -0.039<br>0.053    | Sb excluded       | Sb excluded        |
|             | Mk<br>Mg     | 0.1<br>-0.025       |                       | -0.029<br>0.1      | Mg excluded       | Mg excluded        |
|             | Mk<br>Sb     | 0.042<br>-0.019     |                       | -0.054<br>0.076    | Sb excluded       | Sb excluded        |
|             | Mg<br>Sb     | -0.015<br>0.026     |                       | 0.019<br>-0.007    | Mg excluded       | <b>Sb excluded</b> |
| Constant 10 | Mr<br>Mk     | -0.0024<br>0.0023   |                       | 0.007<br>-0.0068   | Mr excluded       | Mr excluded        |
|             | Mr<br>Mg     | 0.0073<br>-0.0061   |                       | -0.014<br>0.015    | Mg excluded       | Mg excluded        |
|             | Mr<br>Sb     | 0.0089<br>-0.0073   |                       | -0.017<br>0.019    | Sb excluded       | Sb excluded        |
|             | Mk<br>Mg     | 0.01<br>-0.008      |                       | -0.02<br>0.022     | Mg excluded       | Mg excluded        |
|             | Mk           | 0.012               |                       | -0.023             | Sb excluded       | Sb excluded        |
|             | Constant 30  | Mr<br>Mk            | -0.0024<br>0.0023     |                    | 0.007<br>-0.0068  | Mr excluded        |
| Mr<br>Mg    |              | 0.0073<br>-0.0061   |                       | -0.014<br>0.015    | Mg excluded       | Mg excluded        |
| Mr<br>Sb    |              | 0.0089<br>-0.0073   |                       | -0.017<br>0.019    | Sb excluded       | Sb excluded        |
| Mk<br>Mg    |              | 0.01<br>-0.008      |                       | -0.02<br>0.022     | Mg excluded       | Mg excluded        |
| Mk          |              | 0.012               |                       | -0.023             | Sb excluded       | Sb excluded        |

|             |    |         |  |         |             |                             |
|-------------|----|---------|--|---------|-------------|-----------------------------|
|             | Sb | -0.0091 |  | 0.026   |             |                             |
|             | Mg | 0.0014  |  | -0.0026 |             |                             |
|             | Sb | -0.0014 |  | 0.0029  | Sb excluded | Sb excluded                 |
| Constant 50 | Mr | 0.0068  |  | -0.02   |             |                             |
|             | Mk | -0.0057 |  | 0.022   | Mk excluded | <b>coexist</b> <sup>†</sup> |
|             | Mr | 0.02    |  | -0.033  |             |                             |
|             | Mg | -0.012  |  | 0.043   | Mg excluded | Mg excluded                 |
|             | Mr | 0.1     |  | -0.0032 |             |                             |
|             | Sb | -0.025  |  | 0.078   | Sb excluded | Sb excluded                 |
|             | Mk | 0.011   |  | -0.017  |             |                             |
|             | Mg | -0.0083 |  | 0.02    | Mg excluded | Mg excluded                 |
|             | Mk | 0.081   |  | -0.0038 |             |                             |
|             | Sb | -0.023  |  | 0.053   | Sb excluded | Sb excluded                 |
|             | Mg | 0.053   |  | -0.0028 |             |                             |
|             | Sb | -0.02   |  | 0.031   | Sb excluded | <b>Non-persistence</b>      |

\* coexistence in 3 out of 4 replicates in original experiment and 4 out of 8 replicates in follow-up experiment;  
† coexistence in 3 out of 4 replicates.



Table S3: Scaling factor adjusted contribution of  $\Delta I$  and  $\Delta N$  to invader growth rate for all species pairs in all treatments.  $\Delta I$  boxes greyed-out under constant treatments to indicate there is no storage effect in the absence of environmental fluctuations.

| Treatment   | Species pair | $r_{inv}$ | $q_{ir}$ | $adjusted-\Delta I$ | $adjusted-\Delta N$ |        |
|-------------|--------------|-----------|----------|---------------------|---------------------|--------|
| Fluctuating | Mr           | 0.00073   | 0.33     | 0.00021             | -0.072              |        |
|             | Mk           | 0.000065  | 3        | (0) 2.4e-05         | 0.22                |        |
|             | Mr           | 0.05      | 0.49     | 0.0029              | -0.047              |        |
|             | Mg           | -0.017    | 1.9      | 0.0013              | 0.15                |        |
|             | Mr           | 0.065     | 4.8      | 0.026               | 0.037               |        |
|             | Sb           | -0.021    | 0.21     | -0.001              | -0.019              |        |
|             | Mk           | 0.055     | 1.6      | 0.013               | -0.018              |        |
|             | Mg           | -0.017    | 0.62     | 0.0017              | 0.019               |        |
|             | Mk           | 0.06      | 16       | 0.08                | 0.22                |        |
|             | Sb           | -0.021    | 0.069    | -0.00098            | -0.034              |        |
|             | Mg           | 0.018     | 9.9      | 0.061               | 0.15                |        |
|             | Sb           | 0.0029    | 0.1      | 0.0045              | -0.02               |        |
|             | Constant 10  | Mr        | -0.005   | 0.69                |                     | -0.021 |
|             |              | Mk        | 0.006    | 2.9                 |                     | 0.19   |
| Mr          |              | 0.08      | 0.95     |                     | -0.02               |        |
| Mg          |              | -0.02     | 2        |                     | 0.19                |        |
| Mr          |              | 0.03      | 1.9      |                     | -0.0016             |        |
| Sb          |              | -0.016    | 1.1      |                     | 0.06                |        |
| Mk          |              | 0.1       | 1.4      |                     | -0.025              |        |
| Mg          |              | -0.025    | 1.4      |                     | 0.15                |        |
| Mk          |              | 0.042     | 2.71     |                     | 0.02                |        |
| Sb          |              | -0.019    | 0.74     |                     | 0.019               |        |
| Mg          |              | -0.015    | 1.9      |                     | 0.059               |        |
| Sb          |              | 0.026     | 1        |                     | -0.007              |        |
| Constant 30 | Mr           | -0.0024   | 2.1      |                     | 0.12                |        |
|             | Mk           | 0.0023    | 0.94     |                     | -0.012              |        |
|             | Mr           | 0.0073    | 25       |                     | 1.53                |        |
|             | Mg           | -0.0061   | 0.082    |                     | -0.065              |        |
|             | Mr           | 0.0089    | 1        |                     | -0.016              |        |
|             | Sb           | -0.0073   | 2        |                     | 0.1                 |        |
|             | Mk           | 0.01      | 11       |                     | 0.67                |        |
|             | Mg           | -0.008    | 0.18     |                     | -0.057              |        |
|             | Mk           | 0.012     | 0.48     |                     | -0.055              |        |
|             | Sb           | -0.0091   | 4.2      |                     | 0.33                |        |
| Mg          | 0.0014       | 0.042     |          | -0.063              |                     |        |

|             |    |         |       |  |         |
|-------------|----|---------|-------|--|---------|
|             | Sb | -0.0014 | 48    |  | 3.2     |
|             | Mr | 0.0068  | 0.31  |  | -0.074  |
|             | Mk | -0.0057 | 6.4   |  | 0.58    |
|             | Mr | 0.02    | 0.34  |  | -0.067  |
|             | Mg | -0.012  | 5.5   |  | 0.51    |
|             | Mr | 0.1     | 16    |  | 0.0096  |
|             | Sb | -0.025  | 0.13  |  | -0.013  |
| Constant 50 | Mk | 0.011   | 1.1   |  | -0.0094 |
|             | Mg | -0.0083 | 1.7   |  | 0.076   |
|             | Mk | 0.081   | 57    |  | 0.045   |
|             | Sb | -0.023  | 0.04  |  | -0.021  |
|             | Mg | 0.053   | 50    |  | 0.04    |
|             | Sb | -0.02   | 0.044 |  | -0.019  |

## Supplementary text

### Derivation of scaling factors

In this section we describe the derivation of the scaling factors,  $q_{ir}$ . As in [1], we start by defining the competitive effects experienced by each species  $j$  when species  $i$  is invading,  $\mathcal{C}_{j\setminus i}$ , as:

$$\mathcal{C}_{j\setminus i} = -r_j(E_j^*, C_{j\setminus i}). \quad (\text{S1})$$

Here,  $E_j^*$  is the baseline environment and is typically set as the central value of  $E_j(t)$ . Then, the scaling factors,  $q_{ir}$ , are defined as follows:

$$q_{ir} = \frac{\partial \mathcal{C}_{i\setminus i}}{\partial \mathcal{C}_{r\setminus i}}. \quad (\text{S2})$$

For our model, if we set  $E_j^*$  as the mean value  $\overline{\mu_{max_j}}$ , we arrive at the following expression:

$$\mathcal{C}_{j\setminus i} = D - E_j^*/C_j = D - \frac{\overline{\mu_{max_j}}R}{K_j + R}. \quad (\text{S3})$$

To derive  $q_{ir}$  for our model, we turn to equation (SI.16) in [2] since an explicit formula for  $\mathcal{C}_{i\setminus i}$  as a function of  $\mathcal{C}_{r\setminus i}$  cannot be easily found. With this approach, we derived  $q_{ir}$  as follows:

$$q_{ir} = \frac{\partial \mathcal{C}_{i\setminus i}}{\partial \mathcal{C}_{r\setminus i}} = \frac{\partial \mathcal{C}_{i\setminus i}/\partial R}{\partial \mathcal{C}_{r\setminus i}/\partial R} = \frac{\overline{\mu_{max_i}}\overline{K_i}}{\overline{\mu_{max_r}}\overline{K_r}} \times \frac{(\overline{K_r} + \overline{R_r})^2}{(\overline{K_i} + \overline{R_r})^2}. \quad (\text{S4})$$

We used the mean value of  $K_j$  as the half-saturation constant varies with environmental variability in our model. More importantly, we used the mean resource level set by the resident,  $\overline{R_r}$ , instead of its respective  $R^*$ . This is because in our system the pulsing of resources set by the resident results in a mean resource level set by the resident that is slightly greater than expected based on each species  $R^*$ . According to the small-variance assumption of [1], this choice should be immaterial assuming  $\overline{R_r}$  and  $R^*$  differ by  $O(\sigma^2)$ . Nevertheless, as we found in this work, we expect this assumption to break down in many empirical contexts. We refer to this derivation of the scaling factors as semi-analytical as the mean resource level set by the resident is obtained through numerical simulation.

## References

- [1] Chesson P (1994) Multispecies competition in variable environments. *Theoretical Population Biology* 45(3):227–276.
- [2] Ellner SP, Snyder RE, Adler PB (2016) How to quantify the temporal storage effect using simulations instead of math. *Ecology Letters* 19(11):1333–1342.
